# Supplementary material for: Investigation of spaceborne trace gas products over St Petersburg and Yekaterinburg, Russia, by using COllaborative Column Carbon Observing Network (COCCON) observations
Source: Copernicus journal article supplement (doi:10.5194/amt-15-2199-2022), 2022-04-13
Supplement: Supplementary file 1 [file amt-15-2199-2022-supplement.pdf]

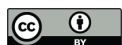

*Supplement of*

**Investigation of spaceborne trace gas products over St Petersburg and Yekaterinburg, Russia, by using COllaborative Column Carbon Observing Network (COCCON) observations**

**Carlos Alberti et al.**

*Correspondence to:* Carlos Alberti ([carlos.alberti@kit.edu](mailto:carlos.alberti@kit.edu)) and Qiansi Tu ([qiansi.tu@kit.edu](mailto:qiansi.tu@kit.edu))

The copyright of individual parts of the supplement might differ from the article licence.

## Supplement

### Correlation between COCCON and satellite products

Figure S1, Figure S2 and Figure S3 shows the comparison between the original COCCON and Satellite products without applying the smoothing corrections.

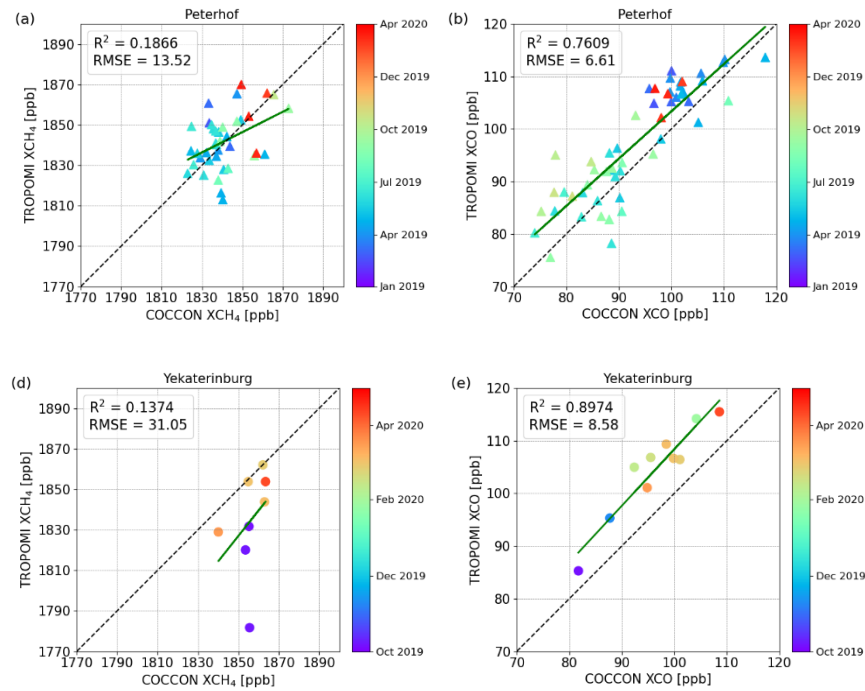

**Figure S1** Correlation plots between TROPOMI and COCCON for XCH<sub>4</sub> and XCO at Peterhof (a-b) and at Yekaterinburg (d-e).

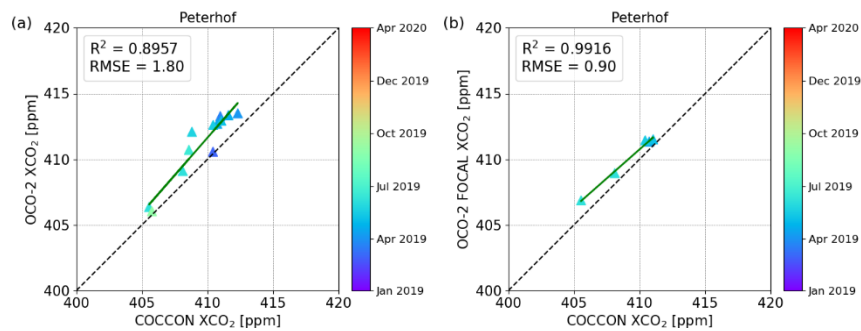

**Figure S2** Correlation plots (a-b) between NASA's operational and the FOCAL OCO-2 product and COCCON for XCO<sub>2</sub> at Peterhof.

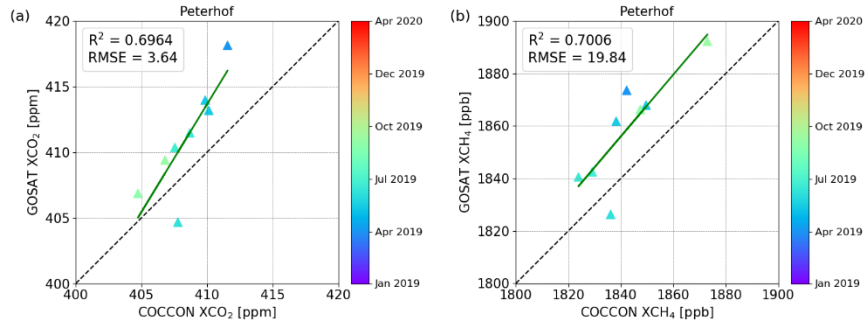

**Figure S3 Correlation plots between GOSAT and COCCON for (a) XCH<sub>4</sub>, (b) XCO at Peterhof.**

Figure S4 shows the averaged bias from different satellite products in comparison with COCCON results. As mentioned above, these comparisons have not taken into account the averaging kernel corrections.

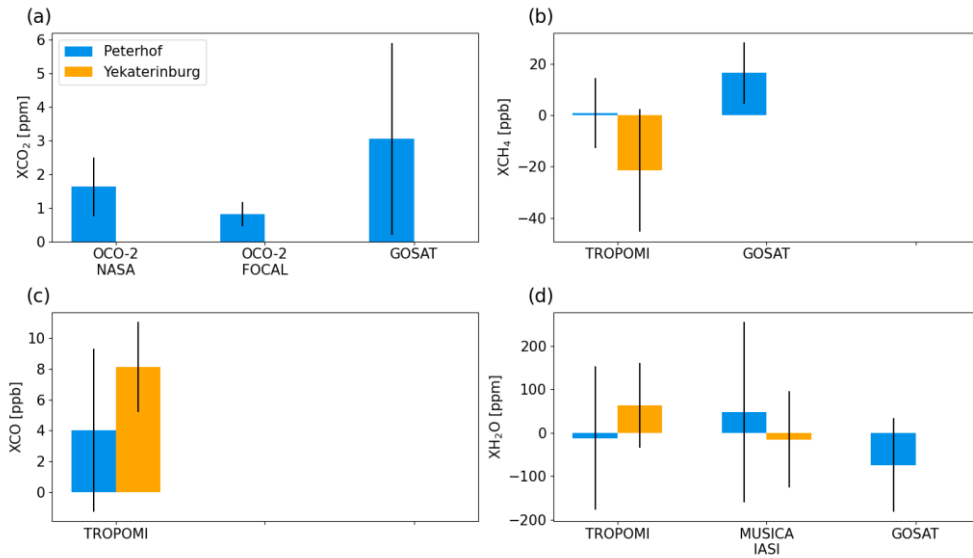

**Figure S4 Bar plots of the averaged bias derived from different products with respect to COCCON for (a) XCO<sub>2</sub>, (b) XCH<sub>4</sub>, (c) XCO and (d) XH<sub>2</sub>O at Peterhof and Yekaterinburg. The error bars represent the standard deviation of the averaged bias.**

## CAMS-COCCON comparisons with satellite products

Figure S5, Figure S6, Figure S7 and Figure S8 shows the comparisons between the combined CAMS-COCCON with satellite products. The main difference with the figures presented in the main paper is that here the original COCCON product by using the MAP files as a-priori was used for generating the combined product, and the fact that no averaging kernel smoothing was applied as well. Finally, in Figure S9 the averaged bias between the CAMS-COCCON product with respect to the satellite products is shown.

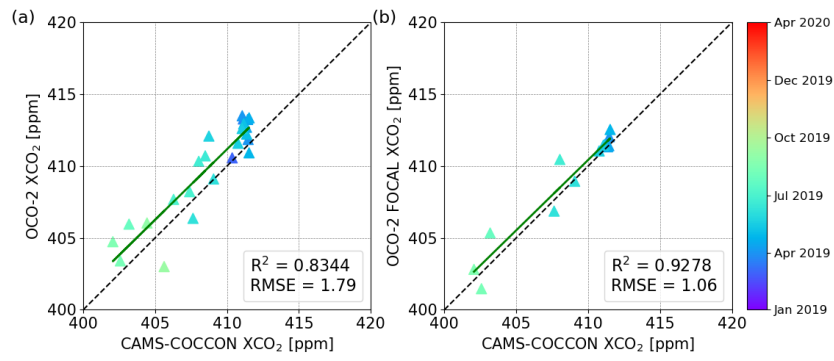

**Figure S5** Correlation plots of (a) OCO-2 and (b) OCO-2 FOCAL with respect to CAMS-COCCON XCO<sub>2</sub> at Peterhof.

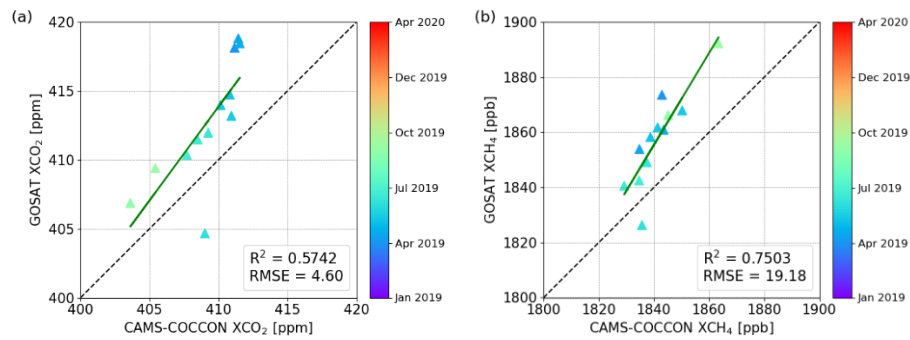

**Figure S6** Correlation plots of (a) GOSAT XCO<sub>2</sub> and (b) GOSAT XCH<sub>4</sub> with respect to CAMS-COCCON at Peterhof.

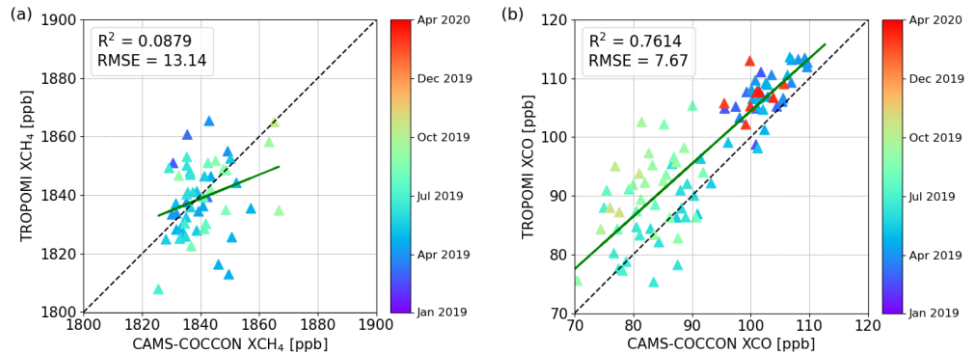

**Figure S7** Correlation plots of (a) TROPOMI XCH<sub>4</sub> and (b) TROPOMI XCO with respect to CAMS-COCCON at Peterhof.

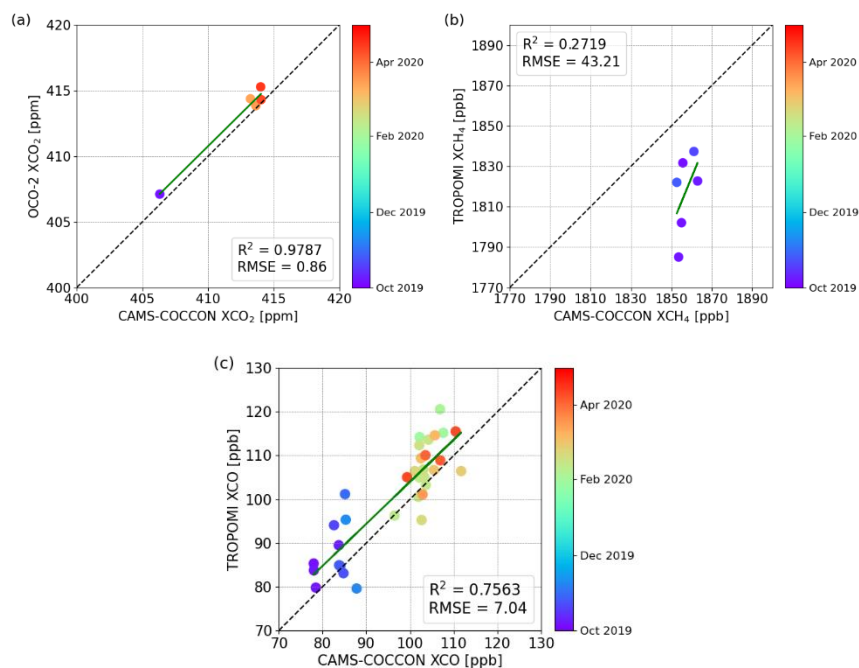

**Figure S8** Correlation plots of (a)  $\text{XCO}_2$  between OCO-2 and CAMS-COCCON, (b)  $\text{XCH}_4$  between TROPOMI and CAMS-COCCON, and (c)  $\text{XCO}$  between TROPOMI and CAMS-COCCON observations at Yekaterinburg.

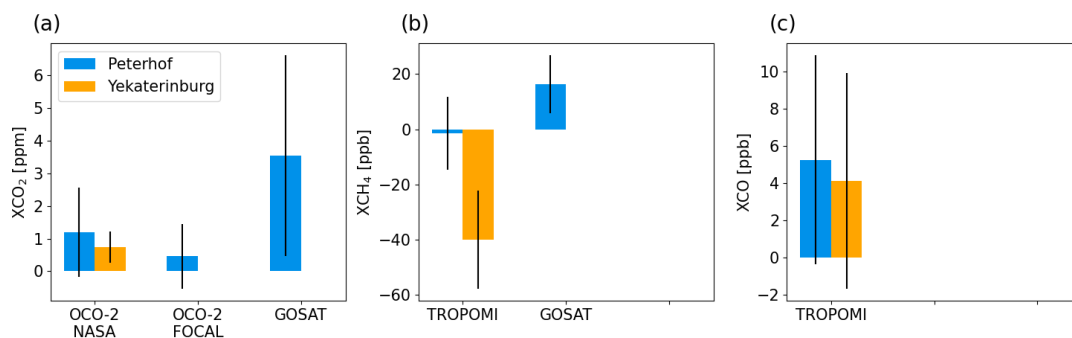

**Figure S9** Bar plots of the averaged bias derived from different products with respect to CAMS-COCCON for (a)  $\text{XCO}_2$ , (b)  $\text{XCH}_4$  and (c)  $\text{XCO}$  at Peterhof and Yekaterinburg. The error bars represent the standard deviation of the bias.

The following table shows a summary of the averaged bias comparison between satellite and COCCON or CAMS-COCCON products but with two differences with respect to the table on the main paper: (1) COCCON is the original product with MAP as a-priori and CAMS-COCCON was generated based on it and (2) no averaging kernel smoothing was considered.

**Table S1** Selected averaged bias and standard deviation between satellite products and COCCON, and between satellite products and CAMS-COCCON at Peterhof and Yekaterinburg. The number of coincident results is shown in the parenthesis.

|               |             | OCO-2 $\text{XCO}_2$<br>(ppm) | TROPOMI $\text{XCH}_4$<br>(ppb) | TROPOMI $\text{XCO}$<br>(ppb) |
|---------------|-------------|-------------------------------|---------------------------------|-------------------------------|
| Peterhof      | COCCON      | $1.63 \pm 0.87$ (15)          | $0.85 \pm 13.67$ (39)           | $4.02 \pm 5.30$ (54)          |
|               | CAMS-COCCON | $1.19 \pm 1.37$ (24)          | $-1.49 \pm 13.18$ (53)          | $5.26 \pm 5.61$ (93)          |
| Yekaterinburg | COCCON      | -- (1)                        | $-21.5 \pm 23.95$ (8)           | $8.12 \pm 2.92$ (11)          |
|               | CAMS-COCCON | $0.74 \pm 0.49$ (5)           | $-40.04 \pm 17.81$ (6)*         | $4.12 \pm 5.80$ (33)          |

\* No CAMS  $\text{XCH}_4$  in 2020.
